# Supplementary material for: Development and validation of the OH-KAP survey for use with pastoral and other rural communities in Africa
Source: One Health Outlook. 2026 May 22;8:36. doi: 10.1186/s42522-026-00213-8 (PMC13404092; doi:10.1186/s42522-026-00213-8)
Supplement: Supplementary file 4 — Supplementary Material 4 [file 42522_2026_213_MOESM4_ESM.xlsx]

## Sheet: Content Validity Calculation
Item Code	Item Statement	Birhanu	Kristina	Lian	Mirgissa	Kebede	Dismas	Seid	Yusuf	Revise	Number of agreement	Item-CVI
K_1	Close contact with livestock can lead to transmission of diseases from animals to humans	4	4	4	4	3	3	4	4		8	1				items with CVI<0.83
K_2	Mosquitoes and other insects can transmit diseases from animals to humans	4	4	4	4	3	3	4	3		8	1
K_3	Farm premises and equipment contaminated with animal secretions can be a source of diseases that can be transmitted from animals to humans	4	4	4	4	3	2	4	3		7	0.875
K_4	Animals can transmit diseases to humans by biting	4	4	4	4	3	3	4	3		8	1
K_5	Livestock birth products like aborted fetus and placenta have germs that can make people sick	4	4	4	4	4	3	4	2		7	0.875
K_6	The disease, rabies, can be transmitted to humans through the bite of an infected dog	4	4	4	4	3	3	4	3		8	1
K_7	The disease, rabies, can be transmitted to humans through the bite of an infected fox	4	4	4	4	3	2	4	2		6	0.75
K_8	The disease, Rift Valley fever, can be transmitted from animals to humans by mosquitoes	4	4	4	4	3	2	4	3		7	0.875
K_9	The disease, Rift Valley fever, can be transmitted from animals to humans through close contact with birth products like aborted fetus and placenta	4	4	4	4	3	3	4	2		7	0.875
K_10	The disease, brucellosis, can be transmitted from animals to humans through drinking raw milk	4	4	4	4	3	3	4	3		8	1
K_11	The disease, bovine tuberculosis, can be transmitted to humans through drinking raw milk	4	4	4	4	3	3	4	4		8	1
K_12	The disease, anthrax, can be transmitted to humans through eating meat from animals that are sick with anthrax	4	4	4	4	3	1	4	4		7	0.875		Terminologies
K_13	The disease, anthrax, can be transmitted to humans through touching the skin or hide of animals that are sick with anthrax	4	4	4	4	3	3	4	3		8	1		I-CVI	No of agreement (per item)/no of raters
K_14	Vaccination of dogs against rabies prevents the disease from being transmitted to humans	4	4	4	4	3	3	4	2		7	0.875		S-CVI	Total I-CVI/no of items
K_15	Contact with animal manure can expose humans to diseases	4	4	4	4	3	2	4	2	K_ZOO_15. Animal manure contains germs that can make people sick.	6	0.75		UA	Total agreement/no of items
K_16	Animals urinating or defecating inside the house can expose humans to diseases	4	4	4	4	3	2	4	3		7	0.875
K_17	The death of animals due to a disease can potentially result in human death from the same disease	4	4	4	4	4	3	4	4		8	1		Total items					147
K_18	Unusual disease outbreaks should be reported to authorities	4	3	4	4	2	3	4	4		7	0.875		Total agreement					27
K_19	Close contact with dogs and cats can lead to humans getting sick	4	4	4	4	3	2	4	3		7	0.875		Sum of I-CVI					132.81
K_20	Not using enough of the antimicrobials prescribed can lead to the ineffectiveness of these drugs as germs become resistant	3	3	4	4	4	3	4	3		8	1		Number of items below I-CVI cutoff of "0.83"					19
K_21	Not taking antimicrobials for the prescribed duration can make the drugs ineffective as germs develop resistance	3	1	4	4	4	3	4	3		7	0.875		Scale-Content Validity Index (S-CVI/ave)/average					0.903466
K_22	Administering antimicrobials to healthy animals is not recommended as this causes germs in animal body to become resistant	2	4	4	4	4	3	4	3		7	0.875		Scale-Content Validity Index (S-CVI/UA)/universal agreement					0.183673
K_23	Treating animal diseases with antimicrobials meant for humans can lead to germs becoming resistant	2	2	4	2	2	2	4	3		3	0.375
K_24	Antimicrobial resistant germs can be passed from animals to humans	4	3	4	4	4	3	4	3		8	1
K_25	During open defecation, soil and water can be contaminated with antimicrobial resistant germs	4	4	4	4	4	1	4	2		6	0.75
K_26	Soil and water can be contaminated with antimicrobial resistant germs that may exist in animal faeces or urine	0	4	4	4	4	2	4	2		5	0.714286
K_27	Antimicrobial drugs can be found in the meat of recently treated animals	0	3	4	4	4	3	4	3		7	1
K_28	Antimicrobial drugs can be found in the milk of recently treated animals	4	4	4	4	4	0	4	3		7	1
K_29	Only animal health professionals can prescribe antimicrobials for livestock	4	4	4	4	4	0	4	3		7	1
K_30	Only healthcare professionals can prescribe antimicrobials for humans	4	4	4	4	4	0	4	3		7	1
K_31	Relying on one antimicrobial drug to treat all animal diseases could lead to germs becoming resistant to that particular drug	4	1	4	4	3	0	4	3		6	0.857143
K_32	Can you list medicines you use for livestock or human? (long list)	4	4	4	4	3	0	4	4		7	1
K_33	From the above list, could you identify those classified as antimicrobials?	2	3	4	0	3	0	4	3		5	0.833333
K_34	Drinking untreated water from communal water sources is unsafe	4	4	4	4	3	0	4	3		7	1
K_35	Boiling milk can reduce the risk of disease transmission from animals to humans	4	4	4	4	3	0	4	4		7	1
K_36	Raw milk can carry harmful germs that can make people sick	4	4	4	4	4	0	4	4		7	1
K_37	Hand washing with soap before eating prevents diseases in humans	3	4	4	4	3	0	4	4		7	1
K_38	Leaving food overnight and eating it the next day without re-cooking poses a health risk	4	3	4	4	3	0	4	4		7	1
K_39	Raw meat contains germs that can make people sick	4	3	4	4	3	0	4	4		7	1
K_40	Undercooked meat contains germs that can make people sick	4	4	4	4	2	0	4	4		6	0.857143
K_41	Cooking meat very well minimizes the risk of disease transmission to humans	4	4	4	4	2	0	4	4		6	0.857143
K_42	Mixing cooked and raw food during preparation or storage can cause food to become contaminated	4	4	4	4	3	0	4	3		7	1
K_43	Sick animals should not be slaughtered for human consumption	4	4	4	4	3	0	4	4		7	1
K_44	Floods increase the risk of food contamination	4	4	4	4	2	0	3	3		6	0.857143
K_45	Floods increase the risk of water contamination	4	4	4	4	4	0	3	3		7	1
K_46	The disease, cholera, is transmitted through contaminated food	4	4	4	4	3	0	4	4		7	1
K_47	The disease, cholera, is transmitted through contaminated water	4	4	4	4	3	0	4	4		7	1
K_48	Meat sold in open markets can be contaminated with germs that can make people sick	4	1	4	4	0	0	4	3		5	0.833333
K_49	Milk sold in plastic containers can be contaminated with germs that can make people sick	4	1	4	4	0	0	1	4		4	0.666667
A_1	How concerned are you about catching diseases from animals?	4	4	4	4	4	0	4	3		7	1
A_2	How worried are you about contracting diseases from consuming raw milk?	4	4	4	4	4	0	4	3		7	1
A_3	How risky is it for children to play with manure?	4	4	4	4	3	3	4	4		8	1
A_4	How concerned are you about contracting diseases when clearing animal manure?	4	4	4	4	3	0	4	4		7	1
A_5	How risky is it to slaughter animals without using protective clothing?	2	4	4	4	2	0	4	4	How important is it to wear protective clothing when slaughtering animals? V important etc.	5	0.714286
A_6	How concerned are you about getting diseases from your animals if they get mixed with other herds?	4	4	4	4	2	3	4	4		7	0.875
A_7	How concerned are you about getting diseases from your animals if your livestock cross borders?	4	4	4	1	0	4	4	4		6	0.857143
A_8	How concerned are you about getting a disease if an animal bites you?	4	4	4	4	0	0	4	4		6	0.857143
A_9	When mosquitos are abundant during flooding, I am afraid of catching Rift Valley Fever disease	4	4	4	4	3	0	3	3		7	1
A_10	When many animals are dying in my area, I am afraid to eat the meat of such animals	4	4	4	4	4	0	4	0		6	1
A_11	How risky is it to touch aborted fetuses or placentas without gloves?	2	4	4	4	3	0	4	3		6	0.857143
A_12	How concerned are you about diseases spreading to humans during an outbreak of animal disease?	4	4	4	4	3	0	4	3		7	1
A_13	How concerned are you about getting diseases from dogs and cats?	1	3	4	4	3	0	4	3		6	0.857143
A_14	When your animals are sick, how likely are you to give them antimicrobials?	4	4	4	2	3	0	4	4		6	0.857143
A_15	How informed do you feel about the proper use of antimicrobials?	4	3	4	4	3	0	4	3		7	1
A_16	To what extent are you concerned that antimicrobials can be ineffective when used to treat animals?	4	0	4	4	3	0	1	3		5	0.833333
A_17	To what extent are you concerned that antimicrobials can be ineffective when used to treat humans?	4	0	4	4	3	0	4	2		5	0.833333
A_18	How risky is it to use expired antimicrobials	4	2	4	4	3	0	4	3		6	0.857143
A_19	How concerned are you about germs developing resistance when buying antimicrobial drugs without a prescription?	4	2	4	4	3	0	4	4		6	0.857143
A_20	To what extent do you agree with restrictions on antimicrobial use?	4	3	4	4	3	0	4	3		7	1
A_21	How concerned are you about the presence of antimicrobial drug residues in meat and/or milk that you consume?	4	4	4	4	3	0	4	2		6	0.857143
A_22	I should always follow the manufacturer's directions when giving antimicrobials to animals	4	4	4	4	2	0	4	3		6	0.857143
A_23	The more antimicrobial I give to the animal the higher the chance that the animal will recover	4	4	4	4	2	0	4	3		6	0.857143
A_24	When animals show improvement, there is no need to complete the entire course of antimicrobial medication	4	0	4	4	2	0	4	3		5	0.833333
A_25	When humans show improvement, there is no need to complete the entire course of antimicrobial medication	4	0	4	4	3	0	4	3		6	1
A_26	It is safe to use an opened antimicrobial bottle again in the future	4	1	4	4	3	0	4	3		6	0.857143
A_27	How risky is it to handle meat without washing your hands with soap afterwards?	4	4	4	4	2	0	4	4		6	0.857143
A_28	How concerned are you about getting sick if you eat food left outside overnight?	0	3	4	4	2	0	3	3		5	0.833333
A_29	How important do you think is it to wash your hands with soap after using a latrine or practicing open defecation?	4	4	4	4	4	0	4	3		7	1
A_30	How important is it for your health to wash hands before and after handling food	4	4	4	4	2	0	4	3		6	0.857143
A_31	How convinced are you that using soap and water is much more effective for hand cleaning compared to using only water?	4	4	4	4	3	0	4	3		7	1
A_32	How concerned are you about getting sick from eating undercooked meat?	4	4	4	4	3	0	4	3		7	1
A_33	How concerned are you about getting sick from eating food prepared by sick individuals?	4	4	4	4	3	0	4	3		7	1
A_34	How concerned are you about getting sick from drinking raw milk?	4	4	4	4	3	0	4	3		7	1
A_35	How concerned are to contract diseases if you consume wildlife meat?	4	4	4	4	3	3	4	4		8	1
A_36	How risky is it to mix raw and cooked food during preparation or storage?	4	4	4	4	3	2	4	3		7	0.875
A_37	How risky is it to drink water from open surfaces or communal water when it is not treated or boiled?	4	4	4	4	3	3	4	3		8	1
A_38	How concerned are you that milk will lose its nutrients if you boil it?	4	3	4	4	3	3	3	3		8	1
P_1	Do you and your livestock sleep under the same roof?	4	4	4	4	4	3	4	3		8	1
P_2	Do you and your livestock share the same drinking water?	4	4	4	4	4	3	4	3		8	1
P_3	Do you slaughter sick animals before they die?	4	4	4	2	4	3	4	4		7	0.875
P_4	Do you vaccinate your livestock against diseases that can be transmitted from animals to humans?	4	0	4	4	3	3	4	2		6	0.857143
P_5	Do you dispose dead animals by burying, burning or combination of both?	4	0	4	4	4	3	4	4		7	1
P_6	Do you practice open defecation?	4	0	4	4	2	3	4	4	Rephrae so it asks about type of latrine used and then recode	6	0.857143
P_7	Do you participate in manure clearing?	4	4	4	4	0	2	4	4		6	0.857143
P_8	If yes, do you usually use a face mask when clearing manure?	2	1	4	4	0	2	4	3		4	0.571429
P_9	If yes, do you usually wear boots when clearing manure?	2	4	4	4	3	3	4	3		7	0.875
P_10	If yes, do you usually wear gloves when clearing manure?	2	2	4	4	3	2	4	3	Do you ever touch animal manure with your bare hands?	5	0.625
P_11	If yes, do you usually wash your hands after clearing manure?	2	4	4	4	3	3	4	3	If yes, do you wash your hands with soap or ash after touching the animal manure?	7	0.875
P_12	Do you assist livestock during birth?	0	4	4	4	4	3	4	3		7	1
P_13	If yes, do you usually wear gloves when assisting livestock during birth?	4	4	4	4	2	3	4	3	Do you ever touch birth products with your bare hands?	7	0.875
P_14	If yes, do you usually wear boots when assisting livestock during birth?	2	4	4	4	2	2	4	3		5	0.625
P_15	If yes, do you usually wear a face mask when assisting livestock during birth?	2	1	4	4	2	3	4	3		5	0.625
P_16	If yes, do you usually wash your hands after assisting animals during the birthing process?	4	4	4	4	4	3	4	3	If yes, do you wash your hands with soap or ash after touching the birth products?	8	1
P_17	Do you report animal disease outbreaks to authorities?	4	2	4	4	2	3	4	4	Rephrase + add human	6	0.75
P_18	Have you ever been bitten by a dog?	4	3	4	4	0	3	4	3		7	1
P_19	If yes, did you wash the wound with soap and water?	4	4	4	4	3	3	4	3	Attitudes: How important is it to wash your hands with soap and water after being bitten by a dog?	8	1
P_20	If yes, did you go to a health facility for treatment?	4	4	4	4	4	3	4	3	If you were bitten by a dog, would you seek healthcare? Y/N then If Y, where would you go - health facility, traditional healer, vet/animal authority	8	1
P_21	Does your herd mix with other herds during grazing and watering?	4	0	4	4	2	3	4	3	Do you isolate your animals when they are sick?	6	0.857143
P_22	Do you closely live with dogs and cats?	4	0	4	4	3	3	4	3		7	1
P_23	Do you clear dog and cat manure?	4	0	4	4	3	3	4	3		7	1
P_24	Do you buy antimicrobials for your livestock?	4	3	4	4	2	3	4	3		7	0.875
P_25	If yes, what is the source of antimicrobials? (tick all that apply)	0	0	4	4	4	3	4	0		5	1
P_26	Do you reuse leftover antimicrobial drugs after the bottle has been opened for some time?	4	1	4	4	0	3	4	3		6	0.857143
P_27	Do you refrigerate antimicrobial drugs?	2	3	4	4	1	3	4	3		6	0.75
P_28	Do you give antimicrobials when your animals have a fever?	4	4	4	4	3	3	1	3		7	0.875
P_29	Do you use expired antimicrobials during drug shortages?	4	1	4	4	4	2	4	2	Do you ever give expired antimicrobials to animals + second Q humans	5	0.625
P_30	Do you check expiry date of antimicrobials before usage?	4	1	4	4	3	3	4	2		6	0.75
P_31	Do you use antimicrobials to protect your livestock from diseases even if they are healthy?	4	2	4	4	3	3	4	3		7	0.875
P_32	Do you use antimicrobials to fatten your livestock for better production?	4	3	4	4	4	2	4	3		7	0.875
P_33	Do you seek advice from an animal health professional before giving antimicrobials to your livestock?	4	3	4	4	4	3	4	4		8	1
P_34	Do you consult with a human health professional before taking antimicrobials yourself?	4	3	4	4	4	3	4	3		8	1
P_35	Do you give medications meant for humans to your animals that you have bought from regular pharmacies?	4	3	4	4	4	2	4	2	Do you give medications meant for humans to your animals?	6	0.75
P_36	Do you follow the recommended course of antimicrobial treatment?	4	0	4	4	3	3	4	3		7	1
P_37	Do you abstain from drinking milk of recently treated animals?	4	4	4	4	3	3	4	3		8	1
P_38	If yes, how long?	4	3	4	4	1	3	4	3		7	0.875
P_39	Do you abstain from eating meat of recently treated animals?	4	4	4	4	4	0	4	3		7	1
P_40	If yes or sometimes, how long?	4	3	4	4	1	3	4	3		7	0.875
P_41	Do you increase the antimicrobial dose if the animal does not recover?	4	4	4	4	4	3	4	3		8	1
P_42	Do you increase the antimicrobial treatment frequency if the animal does not recover?	4	4	4	4	4	3	4	3		8	1
P_43	Do you change the antimicrobial drug without consulting an animal health professional if the initial treatment does not work?	0	4	4	4	4	3	4	3		7	1
P_44	Do you participate livestock milking	4	1	4	4	2	3	4	3		6	0.75
P_45	If yes, do you usually clean milking equipment?	4	0	4	4	3	3	4	4		7	1
P_46	Do you purify your drinking water sourced from the communal water points?	4	1	4	4	0	3	4	3	What is your source of water for drinking? For unsafe, do you boil?	6	0.857143
P_47	Do you cover food to prevent flies from touching the food?	4	2	4	4	4	3	4	3		7	0.875
P_48	Do you use soap to wash your hands before handling food?	4	2	4	4	3	3	4	3	ash	7	0.875
P_49	Do you consume undercooked meat?	4	2	4	4	3	3	4	3		7	0.875
P_50	Do you drink raw milk?	4	4	4	4	3	3	4	3		8	1
P_51	Do you clean animal udder before milking?	4	4	4	4	3	3	4	3		8	1
P_52	Do you wash your hands after using a latrine or practicing open defecation?	4	3	4	4	0	3	4	3	soap and ash	7	1
P_53	Do you wash the cooking and eating utensils after meals with soap?	4	3	4	4	2	3	2	3		6	0.75
P_54	Do you wash your hands with running water and soap before meals?	4	4	4	4	1	3	4	3	before eating	7	0.875
P_55	Do you mix cooked and uncooked food during preparation or storage?	4	3	4	4	3	2	4	3		7	0.875
P_56	Do you slaughter animals inside your home?	4	2	4	4	3	3	4	3		7	0.875
P_57	Do you eat meat from wild animals?	4	4	4	4	4	3	4	3		8	1
P_58	Do you regularly wash your hands with soap?	0	4	4	4	4	3	4	3		7	1
P_59	If you prepare food but don't eat it right away, do you reheat it thoroughly before consuming?	0	2	4	4	4	3	4	3		6	0.857143
P_60	Do you use plastic containers to store milk?	0	1	4	4	3	2	2	3		4	0.571429
